# Supplementary material
Source: Elsevier journal article supplement (https://comptes-rendus.academie-sciences.fr/chimie/article/10.1016/j.crci.2012.09.001/file/attach/mmc2.pdf)

# checkCIF/PLATON report

You have not supplied any structure factors. As a result the full set of tests cannot be run.

No syntax errors found.      CIF dictionary      Interpreting this report

## Datablock: shelxl

---

|                 |                                       |                                               |             |
|-----------------|---------------------------------------|-----------------------------------------------|-------------|
| Bond precision: | C-C = 0.0091 A                        | Wavelength=0.71073                            |             |
| Cell:           | a=22.7345(13)                         | b=22.7345(13)                                 | c=64.308(7) |
|                 | alpha=90                              | beta=90                                       | gamma=120   |
| Temperature:    | 173 K                                 |                                               |             |
|                 | Calculated                            | Reported                                      |             |
| Volume          | 28785(5)                              | 28785(4)                                      |             |
| Space group     | R -3 c                                | R -3c                                         |             |
| Hall group      | -R 3 2" c                             | -R 3 2" c                                     |             |
| Moiety formula  | C55 H48 N O16 Zn4, 1.0(C3 N), 2.01(C) | (Zn 2++)4, (O 2-), (C18 H16 O4)3, (C3 H7 N O) |             |
| Sum formula     | C60 H48 N2 O16 Zn4                    | C63 H69 N3 O16 Zn4                            |             |
| Mr              | 1314.75                               | 1385.69                                       |             |
| Dx, g cm-3      | 0.910                                 | 0.959                                         |             |
| Z               | 12                                    | 12                                            |             |
| Mu (mm-1)       | 1.031                                 | 1.033                                         |             |
| F000            | 8041.4                                | 8592.0                                        |             |
| F000'           | 8058.08                               |                                               |             |
| h,k,lmax        | 30,30,85                              | 30,30,84                                      |             |
| Nref            | 7857                                  | 7806                                          |             |
| Tmin,Tmax       | 0.761,0.813                           |                                               |             |
| Tmin'           | 0.749                                 |                                               |             |

Correction method= Not given

Data completeness= 0.994      Theta(max)= 28.140

R(reflections)= 0.0874( 5728)      wR2(reflections)= 0.2691( 7806)

S = 1.102      Npar= 299

---

The following ALERTS were generated. Each ALERT has the format  
**test-name\_ALERT\_alert-type\_alert-level.**

Click on the hyperlinks for more details of the test.

---

### Alert level B

CHEMW03\_ALERT\_2\_B WARNING: The ratio of given/expected molecular weight as calculated from the \_atom\_site\* data lies outside the range 0.95 <> 1.05

From the CIF: `_cell_formula_units_Z` 12  
 From the CIF: `_chemical_formula_weight` 1385.69  
 TEST: Calculate formula weight from `_atom_site_*`

| atom | mass  | num   | sum    |
|------|-------|-------|--------|
| C    | 12.01 | 59.97 | 720.30 |
| H    | 1.01  | 48.00 | 48.38  |
| N    | 14.01 | 1.98  | 27.73  |
| O    | 16.00 | 16.00 | 255.98 |
| Zn   | 65.39 | 4.00  | 261.56 |

Calculated formula weight 1313.96

|                   |                                             |           |
|-------------------|---------------------------------------------|-----------|
| PLAT043_ALERT_1_B | Check Reported Molecular Weight .....       | 1385.69   |
| PLAT213_ALERT_2_B | Atom C8 has ADP max/min Ratio .....         | 4.3 prola |
| PLAT220_ALERT_2_B | Large Non-Solvent C Ueq(max)/Ueq(min) ...   | 5.2 Ratio |
| PLAT220_ALERT_2_B | Large Non-Solvent O Ueq(max)/Ueq(min) ...   | 5.7 Ratio |
| PLAT230_ALERT_2_B | Hirshfeld Test Diff for O4 -- C11 ..        | 8.7 su    |
| PLAT241_ALERT_2_B | Check High Ueq as Compared to Neighbors for | O3        |

### Alert level C

RFACR01\_ALERT\_3\_C The value of the weighted R factor is > 0.25  
 Weighted R factor given 0.269

|                   |                                                  |            |
|-------------------|--------------------------------------------------|------------|
| PLAT041_ALERT_1_C | Calc. and Reported SumFormula Strings Differ     | ?          |
| PLAT042_ALERT_1_C | Calc. and Reported MoietyFormula Strings Differ  | ?          |
| PLAT068_ALERT_1_C | Reported F000 Differs from Calcd (or Missing)... | ?          |
| PLAT084_ALERT_2_C | High wR2 Value .....                             | 0.27       |
| PLAT213_ALERT_2_C | Atom O4 has ADP max/min Ratio .....              | 3.5 prola  |
| PLAT214_ALERT_2_C | Atom C32 (Anion/Solvent) ADP max/min Ratio       | 4.4 prola  |
| PLAT222_ALERT_3_C | Large Non-Solvent H Uiso(max)/Uiso(min) ..       | 5.8 Ratio  |
| PLAT242_ALERT_2_C | Check Low Ueq as Compared to Neighbors for       | Zn2        |
| PLAT242_ALERT_2_C | Check Low Ueq as Compared to Neighbors for       | C4         |
| PLAT242_ALERT_2_C | Check Low Ueq as Compared to Neighbors for       | C11        |
| PLAT242_ALERT_2_C | Check Low Ueq as Compared to Neighbors for       | C14        |
| PLAT242_ALERT_2_C | Check Low Ueq as Compared to Neighbors for       | C16        |
| PLAT341_ALERT_3_C | Low Bond Precision on C-C Bonds .....            | 0.0091 Ang |

### Alert level G

FORMU01\_ALERT\_1\_G There is a discrepancy between the atom counts in the `_chemical_formula_sum` and `_chemical_formula_moiety`. This is usually due to the moiety formula being in the wrong format.  
 Atom count from `_chemical_formula_sum`: C63 H69 N3 O16 Zn4  
 Atom count from `_chemical_formula_moiety`: C57 H55 N1 O14 Zn4

FORMU01\_ALERT\_2\_G There is a discrepancy between the atom counts in the `_chemical_formula_sum` and the formula from the `_atom_site*` data.  
 Atom count from `_chemical_formula_sum`: C63 H69 N3 O16 Zn4  
 Atom count from the `_atom_site` data: C59.97 H48 N1.98 O16 Zn4

CELLZ01\_ALERT\_1\_G Difference between formula and `atom_site` contents detected.  
 CELLZ01\_ALERT\_1\_G ALERT: Large difference may be due to a symmetry error - see SYMMG tests

From the CIF: `_cell_formula_units_Z` 12  
 From the CIF: `_chemical_formula_sum` C63 H69 N3 O16 Zn4  
 TEST: Compare cell contents of formula and `atom_site` data

| atom | Z*formula | cif sites | diff   |
|------|-----------|-----------|--------|
| C    | 756.00    | 719.64    | 36.36  |
| H    | 828.00    | 576.00    | 252.00 |
| N    | 36.00     | 23.76     | 12.24  |
| O    | 192.00    | 192.00    | 0.00   |
| Zn   | 48.00     | 48.00     | 0.00   |

HYDTR01\_ALERT\_1\_G Extra text has been found in the `_refine_ls_hydrogen_treatment` field. Explanatory text should be in the `_publ_section_refinement` field.

Hydrogen treatment given as constrained  
Hydrogen treatment identified as constr

|                   |                                                  |            |
|-------------------|--------------------------------------------------|------------|
| PLAT002_ALERT_2_G | Number of Distance or Angle Restraints on AtSite | 9          |
| PLAT003_ALERT_2_G | Number of Uiso or Uij Restrained Atom Sites .... | 1          |
| PLAT004_ALERT_5_G | Info: Polymeric Structure Found with Dimension . | 3          |
| PLAT005_ALERT_5_G | No _iucr_refine_instructions_details in CIF .... | ?          |
| PLAT072_ALERT_2_G | SHELXL First Parameter in WGHT Unusually Large.  | 0.18       |
| PLAT083_ALERT_2_G | SHELXL Second Parameter in WGHT Unusually Large. | 68.44      |
| PLAT194_ALERT_1_G | Missing _cell_measurement_reflns_used datum .... | ?          |
| PLAT195_ALERT_1_G | Missing _cell_measurement_theta_max datum ....   | ?          |
| PLAT196_ALERT_1_G | Missing _cell_measurement_theta_min datum ....   | ?          |
| PLAT232_ALERT_2_G | Hirshfeld Test Diff (M-X) Zn2 -- O3 ..           | 30.3 su    |
| PLAT232_ALERT_2_G | Hirshfeld Test Diff (M-X) Zn2 -- O21 ..          | 7.0 su     |
| PLAT242_ALERT_2_G | Check Low Ueq as Compared to Neighbors for       | 031        |
| PLAT301_ALERT_3_G | Note: Main Residue Disorder .....                | 6 Perc.    |
| PLAT302_ALERT_4_G | Note: Anion/Solvent Disorder .....               | 100 Perc.  |
| PLAT432_ALERT_2_G | Short Inter X...Y Contact O3 .. C21 ..           | 2.85 Ang.  |
| PLAT605_ALERT_4_G | Structure Contains Solvent Accessible VOIDS of . | 1652 A**3  |
| PLAT764_ALERT_4_G | Overcomplete CIF Bond List Detected (Rep/Expd) . | 1.30 Ratio |
| PLAT773_ALERT_2_G | Check long C-C Bond in CIF: C22 -- C23 .         | 1.97 Ang.  |
| PLAT811_ALERT_5_G | No ADDSYM Analysis: Too Many Excluded Atoms .... | !          |
| PLAT860_ALERT_3_G | Note: Number of Least-Squares Restraints .....   | 13         |
| PLAT869_ALERT_4_G | ALERTS Related to the use of SQUEEZE Suppressed  | !          |

---

0 **ALERT level A** = Most likely a serious problem - resolve or explain  
7 **ALERT level B** = A potentially serious problem, consider carefully  
14 **ALERT level C** = Check. Ensure it is not caused by an omission or oversight  
26 **ALERT level G** = General information/check it is not something unexpected

11 ALERT type 1 CIF construction/syntax error, inconsistent or missing data  
24 ALERT type 2 Indicator that the structure model may be wrong or deficient  
5 ALERT type 3 Indicator that the structure quality may be low  
4 ALERT type 4 Improvement, methodology, query or suggestion  
3 ALERT type 5 Informative message, check

---

---

## Our explanation to Checkcif Alert level B

1. CHEMW03\_ALERT\_2\_B WARNING: The ratio of given/expected molecular weight as

calculated from the `_atom_site*` data lies outside the range  $0.95 <> 1.05$

From the CIF: `_cell_formula_units_Z` 12

From the CIF: `_chemical_formula_weight` 1385.69

TEST: Calculate formula weight from `_atom_site_*`

| atom                      | mass  | num   | sum     |
|---------------------------|-------|-------|---------|
| C                         | 12.01 | 59.97 | 720.30  |
| H                         | 1.01  | 48.00 | 48.38   |
| N                         | 14.01 | 1.98  | 27.73   |
| O                         | 16.00 | 16.00 | 255.98  |
| Zn                        | 65.39 | 4.00  | 261.56  |
| Calculated formula weight |       |       | 1313.96 |

Answer: One of the dimethylformamide (DMF) molecules (O21 C21 N21 C22 C23) is obviously disordered, according to the significant residual electronic density, but it is not possible to resolve it. In the refinement only one part (assumed as a half) is given. This is, along with the non-refined hydrogen molecules of the DMF molecules gives the difference.

The structure is porous. The reflexes of the disordered guest molecules were removed by SQUEEZE (Platon).

2. PLAT043\_ALERT\_1\_B Check Reported Molecular Weight ..... 1385.69

See 1.

3. PLAT214\_ALERT\_2\_B Atom C8 has ADP max/min Ratio ..... 4.3 prola

C8 atom is a most distant non-hydrogen atom from axis of the biphenyl molecule, which is rotationally not completely fixed. High anisotropic Ueq is natural.

4. PLAT220\_ALERT\_2\_B Large Non-Solvent C Ueq(max)/Ueq(min) ... 5.2 Ratio

5. PLAT220\_ALERT\_2\_B Large Non-Solvent O Ueq(max)/Ueq(min) ... 5.7 Ratio

The weakly coordinated DMF molecules are disordered, which is the source of atoms with high Ueq

It is advisable to attempt to resolve as many as possible of the alerts in all categories. Often the minor alerts point to easily fixed oversights, errors and omissions in your CIF or refinement strategy, so attention to these fine details can be worthwhile. In order to resolve some of the more serious problems it may be necessary to carry out additional measurements or structure refinements. However, the purpose of your study may justify the reported deviations and the more serious of these should normally be commented upon in the discussion or experimental section of a paper or in the "special\_details" fields of the CIF. checkCIF was carefully designed to identify outliers and unusual parameters, but every test has its limitations and alerts that are not important in a particular case may appear. Conversely, the absence of alerts does not guarantee there are no aspects of the results needing attention. It is up to the individual to critically assess their own results and, if necessary, seek expert advice.

### **Publication of your CIF in IUCr journals**

A basic structural check has been run on your CIF. These basic checks will be run on all CIFs submitted for publication in IUCr journals (*Acta Crystallographica*, *Journal of Applied Crystallography*, *Journal of Synchrotron Radiation*); however, if you intend to submit to *Acta Crystallographica Section C* or *E*, you should make sure that full publication checks are run on the final version of your CIF prior to submission.

### **Publication of your CIF in other journals**

Please refer to the *Notes for Authors* of the relevant journal for any special instructions relating to CIF submission.

---

**PLATON version of 15/02/2012; check.def file version of 10/02/2012**

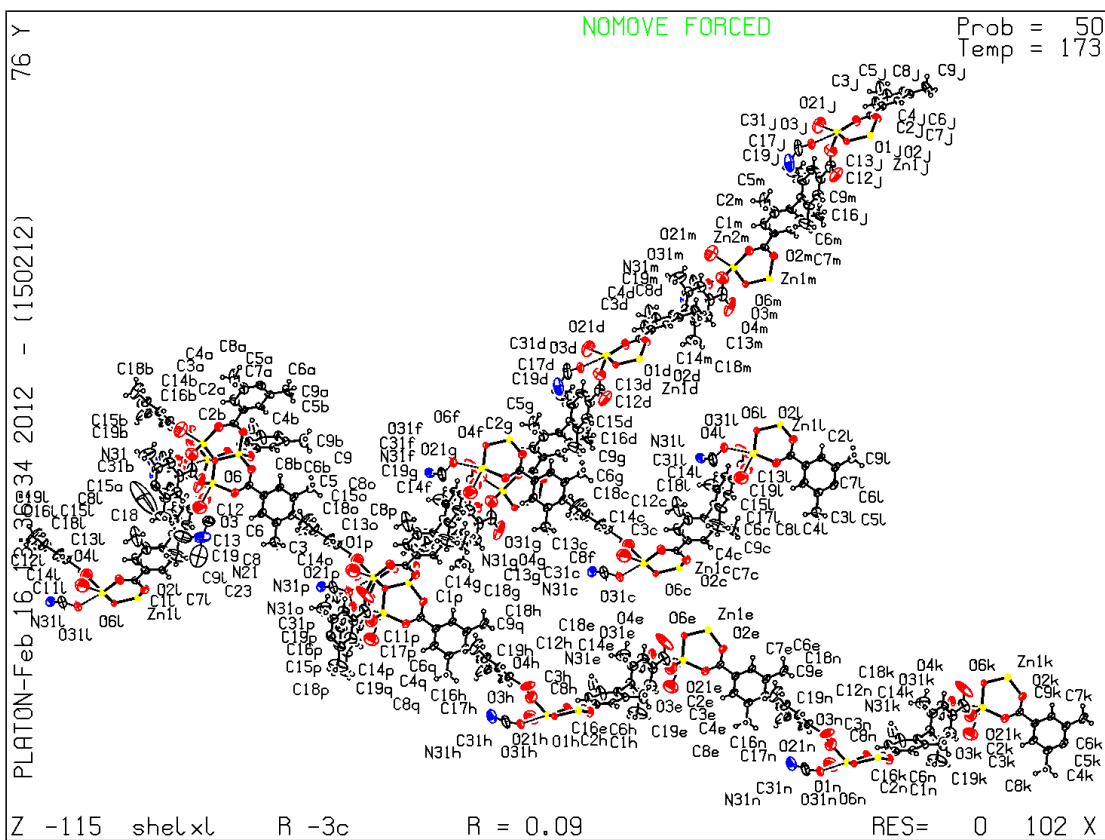

Supplement: mmc2 [file mmc2.pdf]
